# Supplementary material
Source: PubMed Central journal article supplement (PMC6372588)
Supplement: 41386_2018_279_MOESM1_ESM.pdf [file 41386_2018_279_MOESM1_ESM.pdf]

## Supplementary Figure 1.

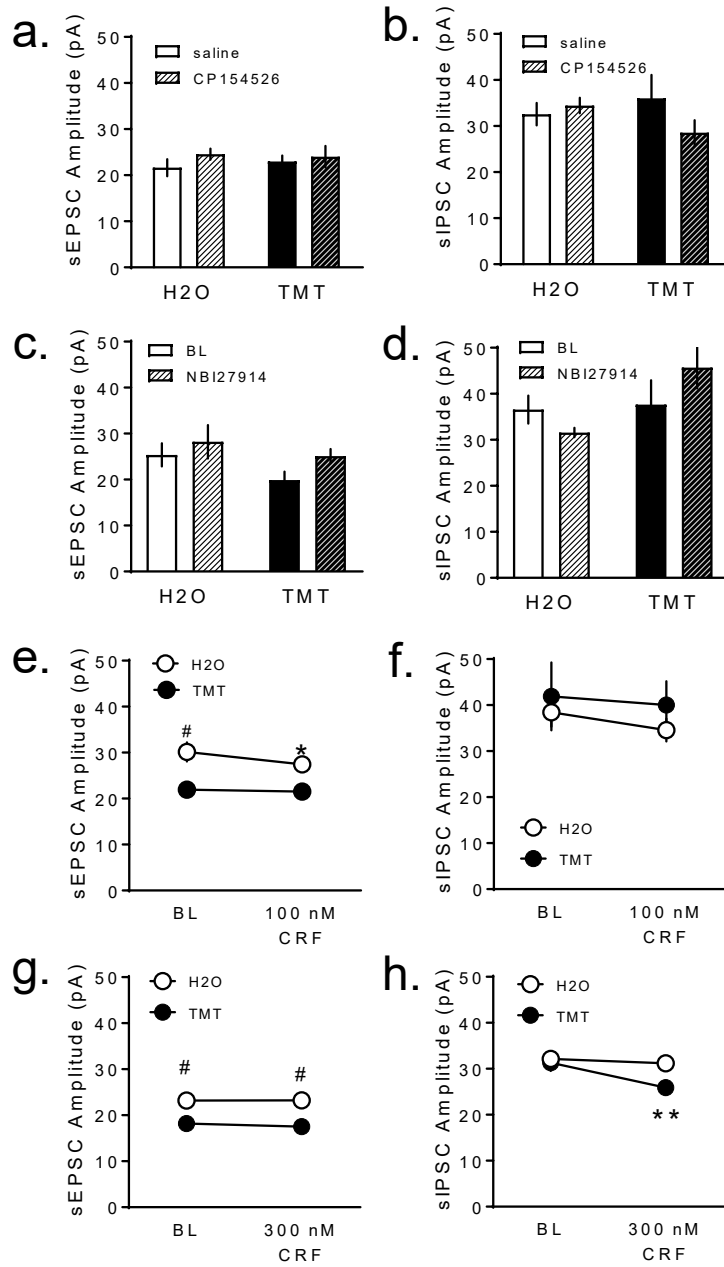

These supplementary figures complement the PL 2/3 data presented in Fig 5. Bars represent a) sEPSC amplitude (pA) and b) sIPSC amplitude (pA) in H2O (white) and TMT (black) cells after pretreatment with 10 mg/kg CP154526 (striped) or saline (non-striped). Also, c) sEPSC amplitude and d) sIPSC amplitude in H2O (white) and TMT (black) cells with bath application of NBI27914 (striped) versus its baseline (non-striped). In the lower four panels, circles represent e) sEPSC amplitude and f) sIPSC amplitude following bath application of 100 nM CRF versus baseline in H2O (white) and TMT (black) cells. Also, g) sEPSC amplitude and h) sIPSC amplitude following bath application of 300 nM CRF versus baseline. # $p < 0.05$  vs. TMT. \* $p < 0.05$  vs. baseline. \*\* $p < 0.01$  vs. baseline.
