# Supplementary material
Source: PubMed Central journal article supplement (PMC6372588)
Supplement: 41386_2018_279_MOESM2_ESM.pdf [file 41386_2018_279_MOESM2_ESM.pdf]

Supplementary Table 1.

| cohort | condition | mice/condition | behavior | c-Fos | physiology | cohort total |
|--------|-----------|----------------|----------|-------|------------|--------------|
| 1      | H2O       | 12             | 12       | 6     | 6          | <b>40</b>    |
|        | VNL       | 15             | 15       | 6     | 9          |              |
|        | TMT       | 13             | 13       | 6     | 7          |              |
| 2      | H2O       | 5              |          |       | 5          | <b>10</b>    |
|        | VNL       | 1              |          |       | 1          |              |
|        | TMT       | 4              |          |       | 4          |              |
| 3      | H2O       | 16             | 16       |       | 8          | <b>32</b>    |
|        | TMT       | 16             | 16       |       | 8          |              |
|        |           |                |          |       |            | <b>82</b>    |

Sample sizes for the experiments are illustrated in the Table. All mice in Cohort 1 were used for initial behavioral characterization, and further used for either c-Fos immunohistochemistry or physiology. Cohort 2 was used in physiology experiments that were not included in behavior. Cohort 3 was used for the CP154526 (versus saline) i.p. injection behavioral studies, and half were used for physiology.
